# Supplementary material for: Large Scale Loss of Data in Low-Diversity Illumina Sequencing Libraries Can Be Recovered by Deferred Cluster Calling
Source: PubMed Central journal article supplement (PMC3030592; doi:10.1371/journal.pone.0016607), 2011-01-28

Figure S1

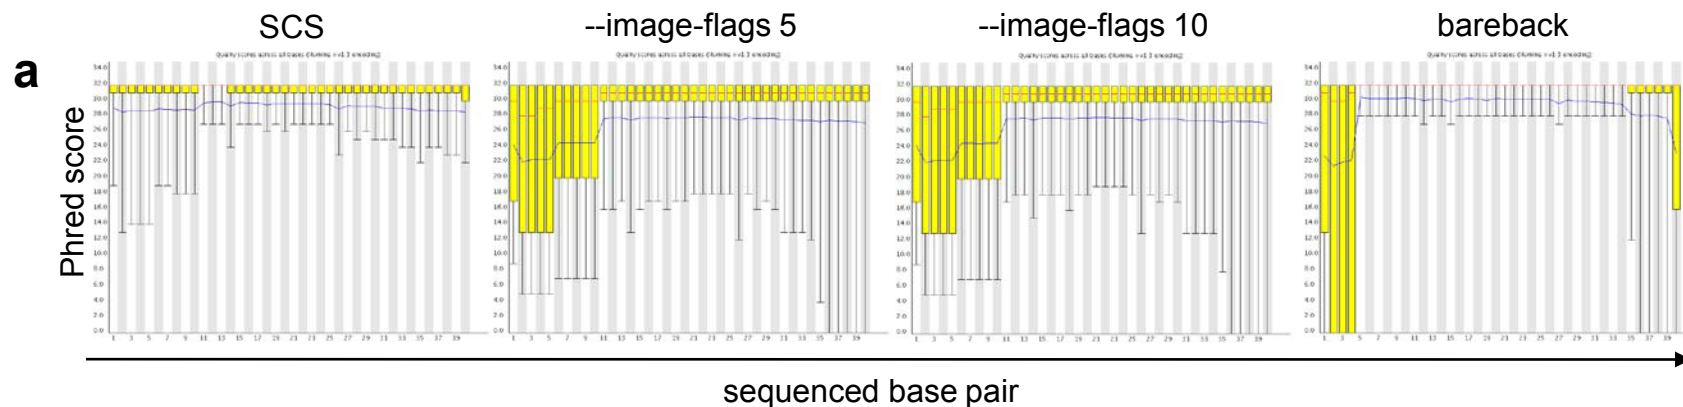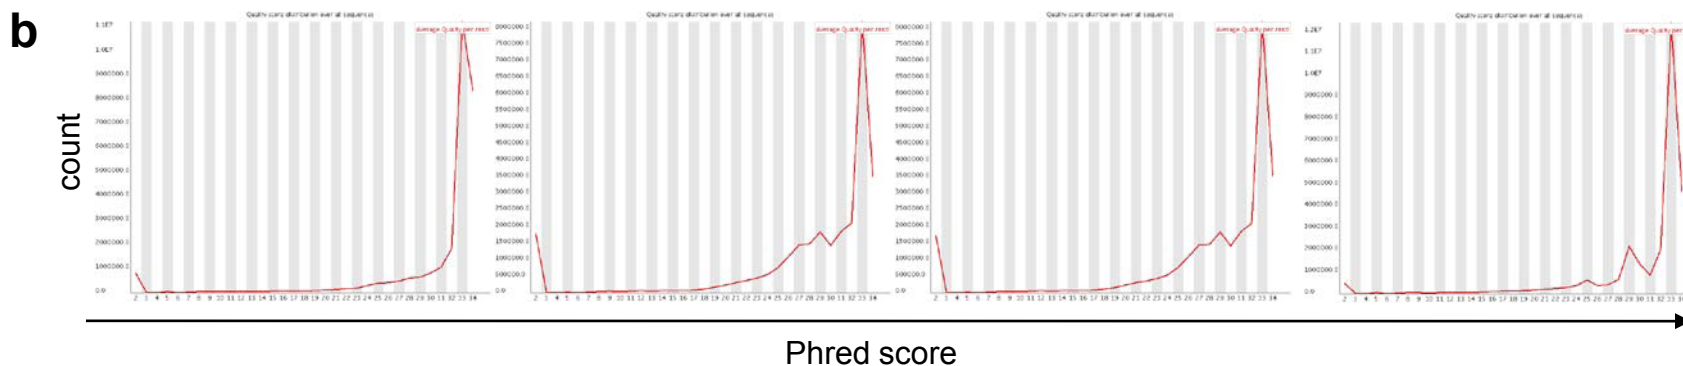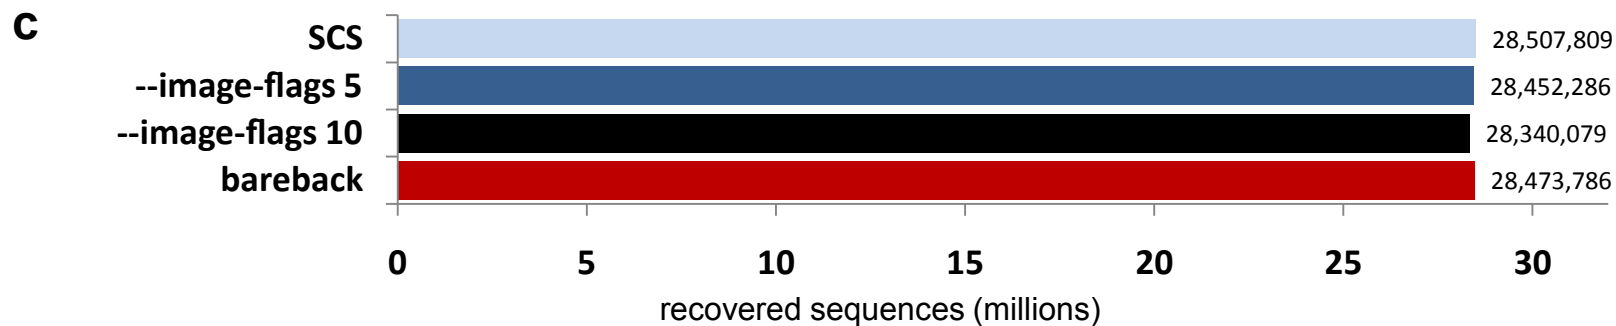

Figure S1

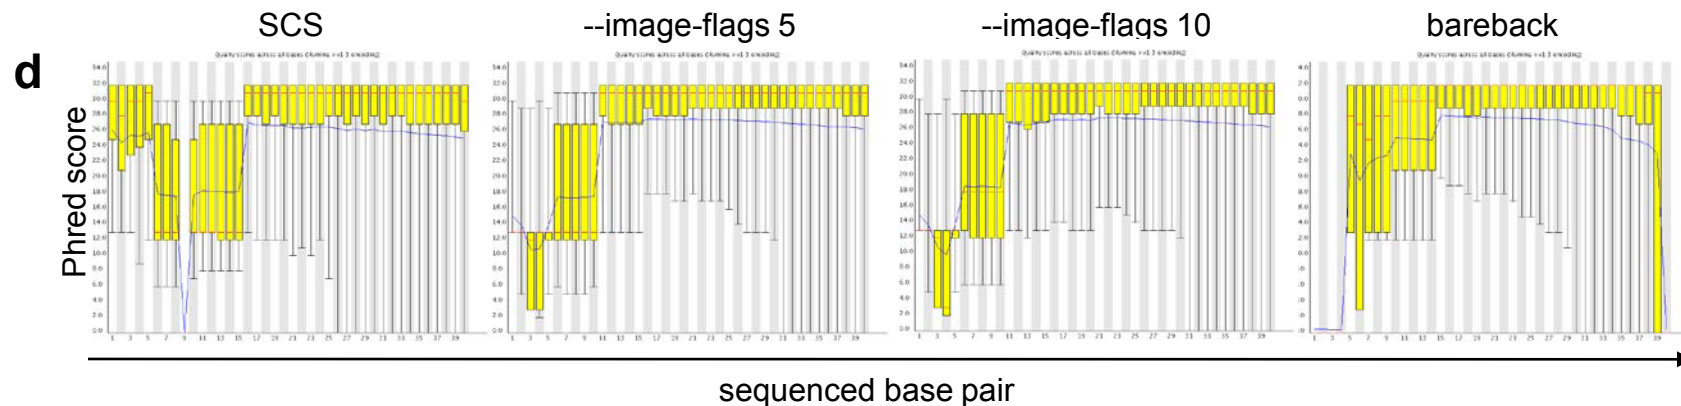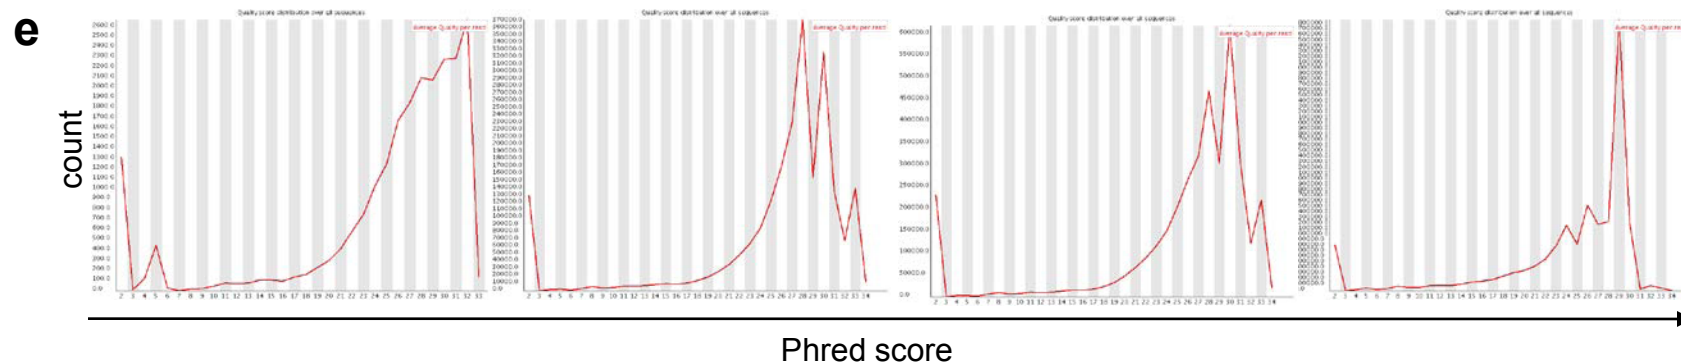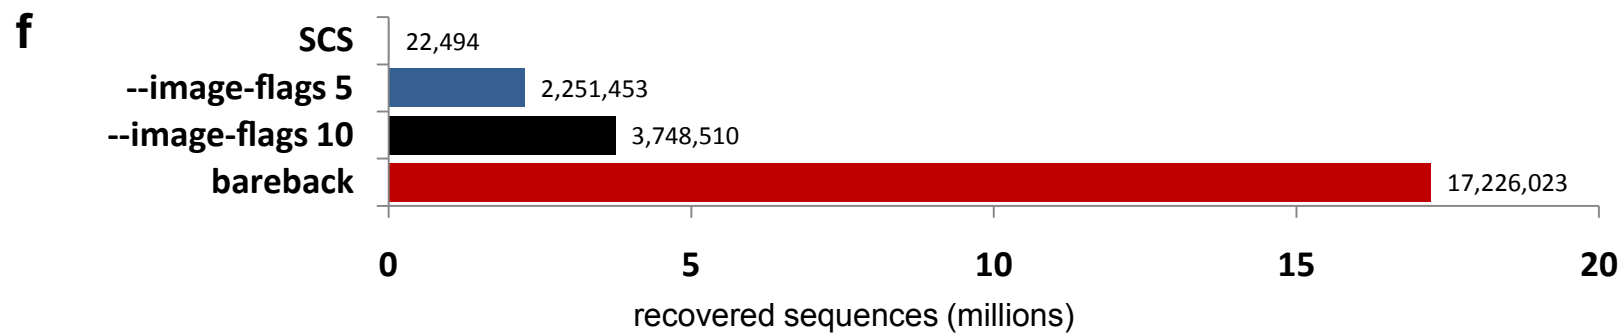

Figure S1

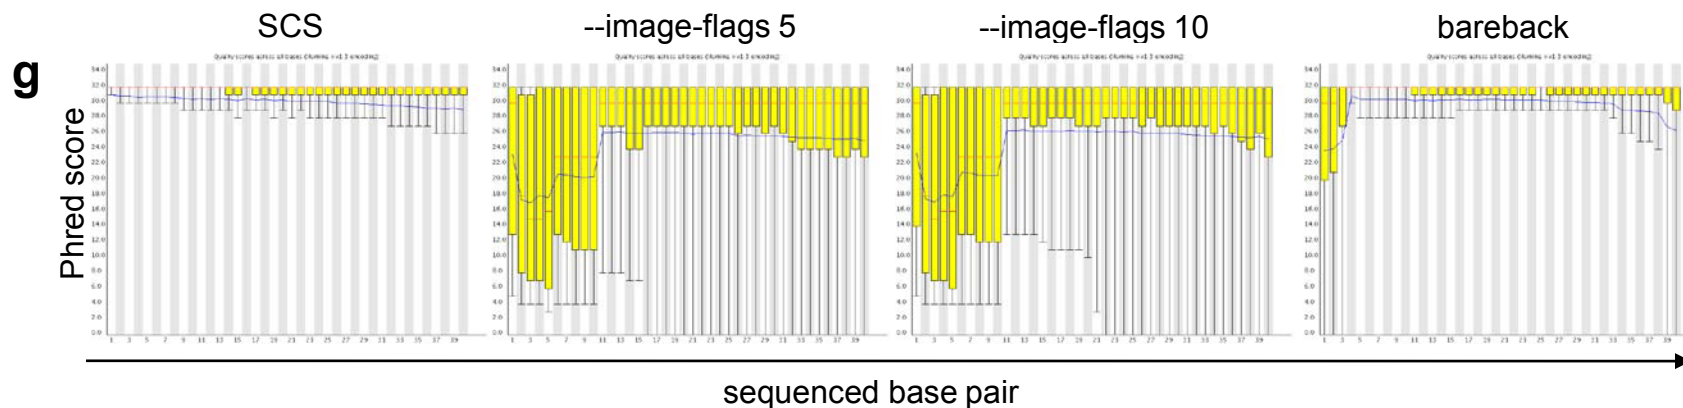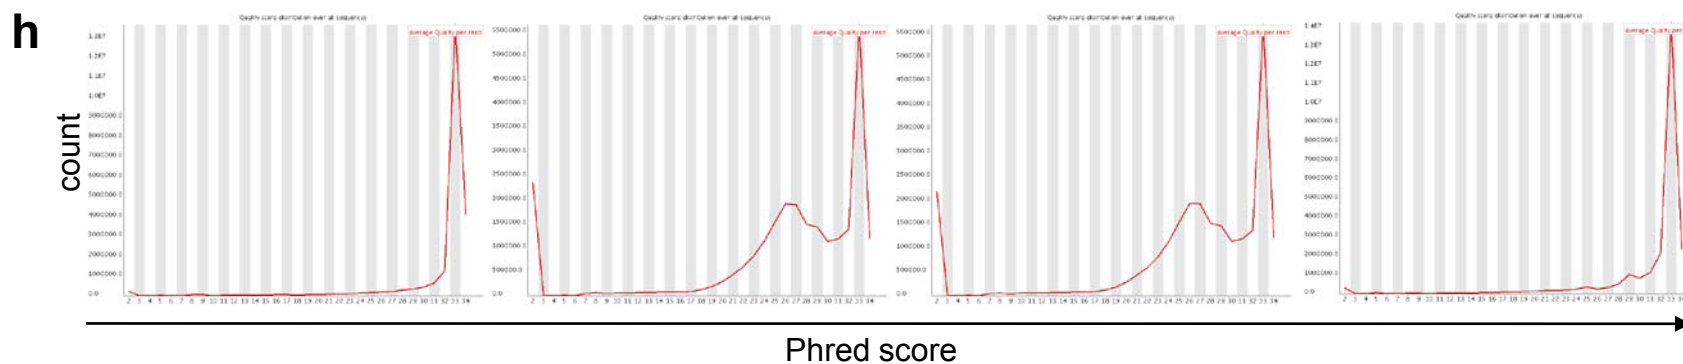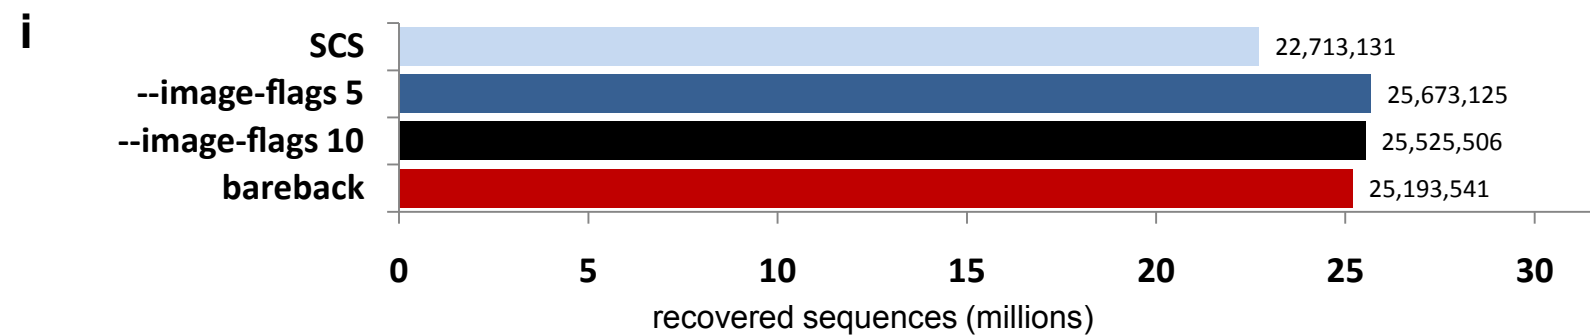

Supplement: pone.0016607.s001.pdf [file pone.0016607.s001.pdf]
