# Supplementary material for: Large Scale Loss of Data in Low-Diversity Illumina Sequencing Libraries Can Be Recovered by Deferred Cluster Calling
Source: PubMed Central journal article supplement (PMC3030592; doi:10.1371/journal.pone.0016607), 2011-01-28

Figure S2

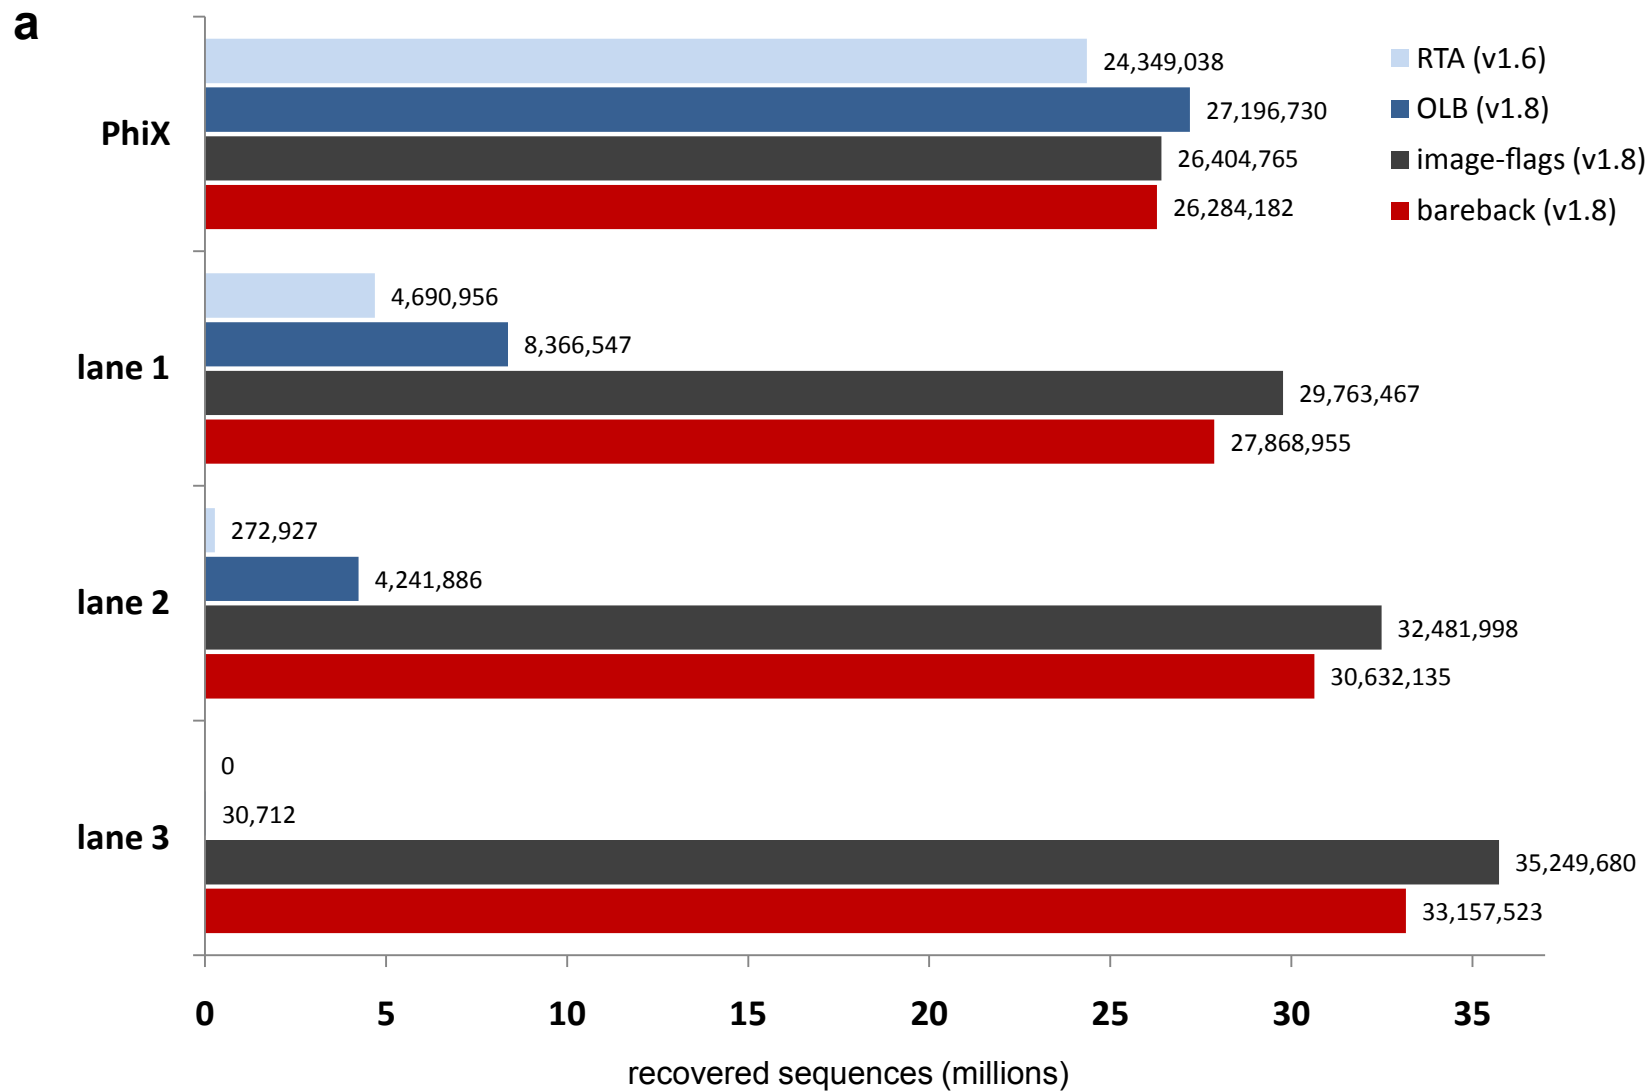

**b**

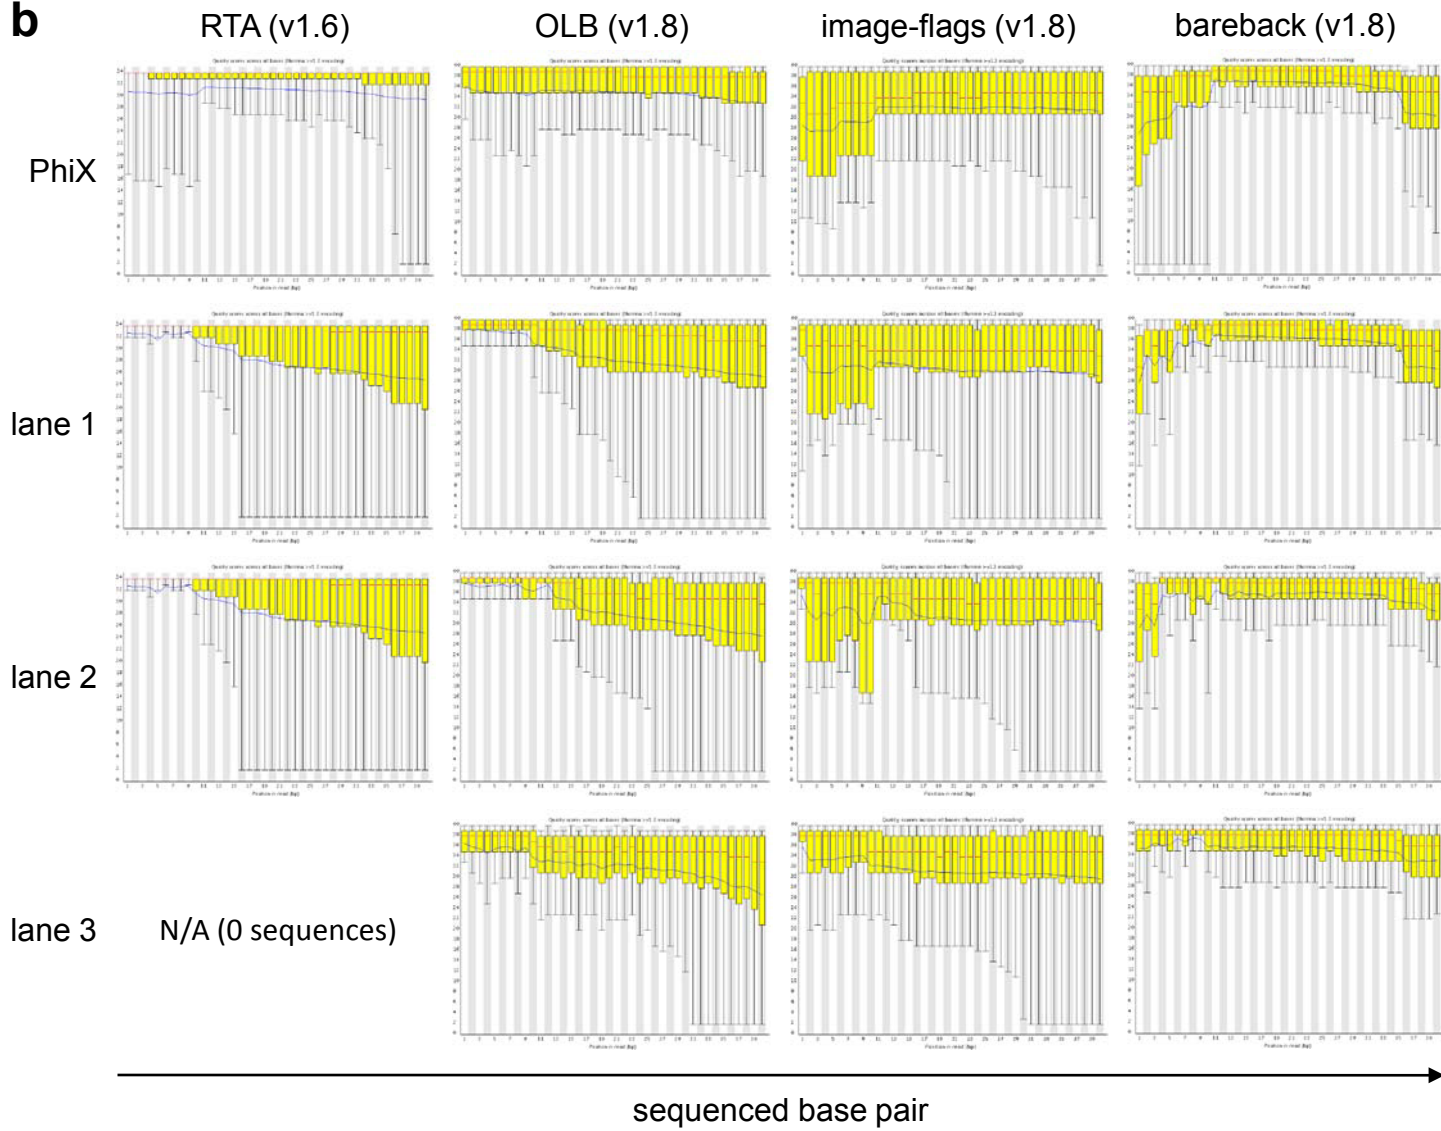

**C**

RTA (v1.6)

OLB (v1.8)

image-flags (v1.8)

bareback (v1.8)

PhiX

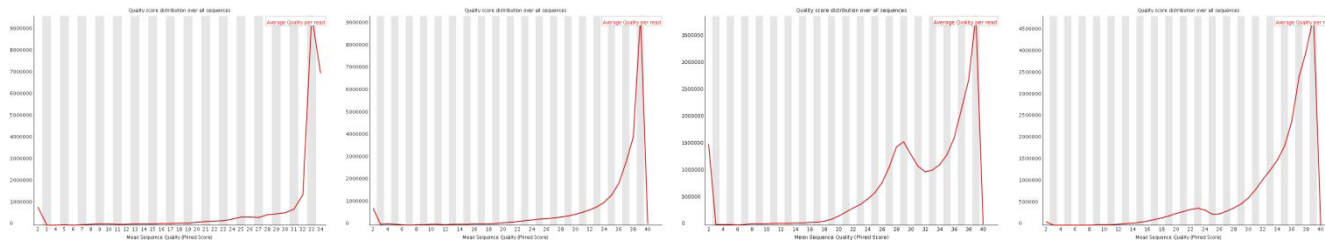

lane 1

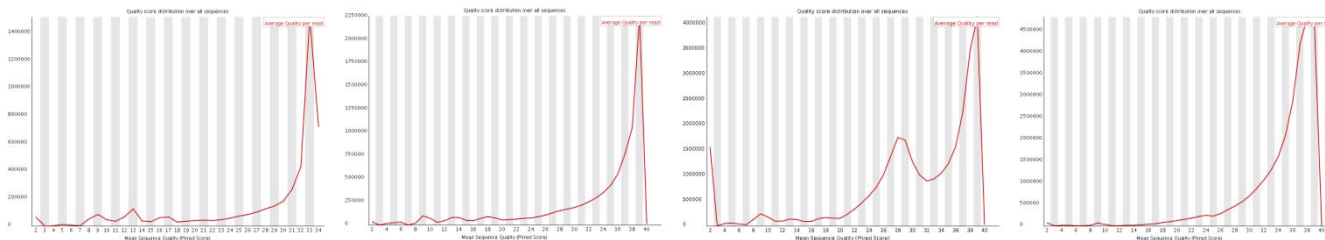

lane 2

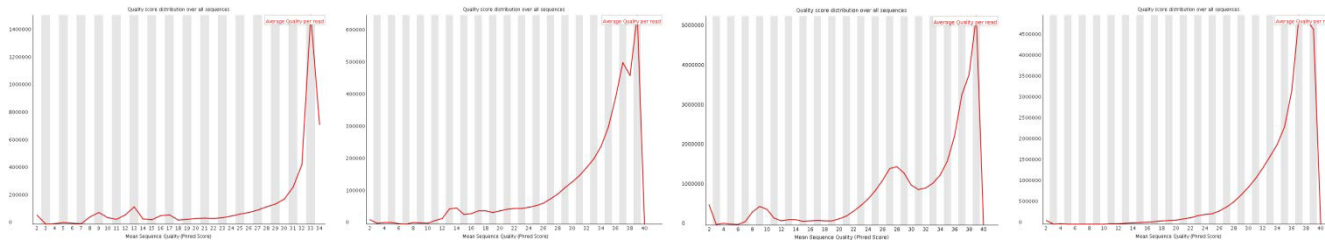

lane 3

N/A (0 sequences)

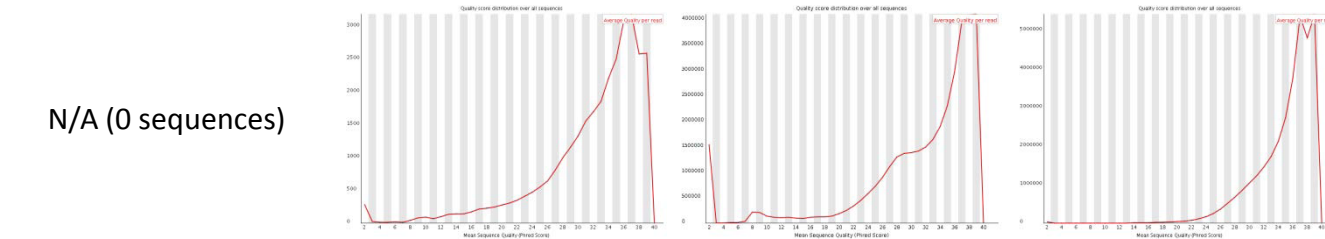

Phred score

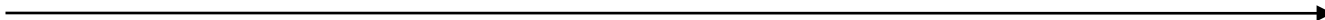

Supplement: pone.0016607.s002.pdf [file pone.0016607.s002.pdf]
